# Supplementary material for: Whole blood DNA methylation aging markers predict colorectal cancer survival: a prospective cohort study
Source: PubMed Central journal article supplement (PMC7708179; doi:10.1186/s13148-020-00977-4), 2020-11-30
Supplement: 13148_2020_977_MOESM1_ESM.pdf [file 13148_2020_977_MOESM1_ESM.pdf]

Supplementary Table 1. Levels of DNA methylation aging markers according to demographic and clinical characteristics at baseline in the DACHS study

| Baseline characteristics             | AgeAccelHorvath     |            | AgeAccelHannum      |            | DNAmMRscore          |            | AgeAccelPheno       |            | AgeAccelGrim         |            |
|--------------------------------------|---------------------|------------|---------------------|------------|----------------------|------------|---------------------|------------|----------------------|------------|
|                                      | Median (IQR)        | <i>P</i> * | Median (IQR)        | <i>P</i> * | Median (IQR)         | <i>P</i> * | Median (IQR)        | <i>P</i> * | Median (IQR)         | <i>P</i> * |
| Sex                                  |                     |            |                     |            |                      |            |                     |            |                      |            |
| Women                                | -1.07 (-3.56, 1.76) | <.001      | -1.52 (-3.85, 1.10) | <.001      | -2.03 (-2.38, -1.65) | <.001      | -1.14 (-4.91, 2.53) | <.001      | -3.14 (-5.31, -0.20) | <.001      |
| Men                                  | 0.46 (-2.46, 3.19)  |            | 0.82 (-1.91, 3.35)  |            | -1.80 (-2.15, -1.41) |            | 0.36 (-3.48, 4.47)  |            | 1.22 (-1.45, 4.65)   |            |
| Age at diagnosis                     |                     |            |                     |            |                      |            |                     |            |                      |            |
| 33 ≤ - < 55 year                     | -1.17 (-3.27, 2.27) | 0.035      | -1.00 (-3.05, 1.92) | 0.064      | -2.06 (-2.41, -1.68) | <.001      | -0.88 (-4.51, 3.06) | 0.166      | -0.75 (-3.98, 3.43)  | 0.829      |
| 55 ≤ - < 65 year                     | -0.01 (-2.66, 2.79) |            | -0.13 (-2.64, 2.69) |            | -2.00 (-2.41, -1.60) |            | -0.22 (-3.87, 4.01) |            | -0.40 (-3.82, 3.54)  |            |
| 65 ≤ - < 75 year                     | 0.08 (-2.81, 2.85)  |            | -0.03 (-2.50, 2.81) |            | -1.89 (-2.25, -1.50) |            | -0.02 (-3.96, 3.76) |            | -0.68 (-3.43, 3.15)  |            |
| 75 ≤ - ≤ 96 year                     | -0.37 (-3.54, 2.72) |            | -0.34 (-3.45, 2.86) |            | -1.76 (-2.08, -1.43) |            | -0.57 (-4.09, 3.60) |            | -0.23 (-3.08, 2.35)  |            |
| TNM stage                            |                     |            |                     |            |                      |            |                     |            |                      |            |
| I                                    | -0.16 (-2.90, 2.78) | 0.229      | -0.39 (-3.21, 2.13) | 0.004      | -2.00 (-2.34, -1.70) | <.001      | -1.10 (-5.20, 2.42) | <.001      | -1.17 (-4.34, 1.97)  | <.001      |
| II                                   | -0.04 (-2.69, 2.66) |            | -0.03 (-2.71, 2.87) |            | -1.87 (-2.25, -1.47) |            | -0.02 (-3.65, 4.01) |            | -0.11 (-3.24, 3.64)  |            |
| III                                  | -0.58 (-3.30, 2.60) |            | -0.71 (-3.28, 2.34) |            | -1.85 (-2.27, -1.48) |            | -0.51 (-4.29, 3.26) |            | -0.90 (-3.61, 2.38)  |            |
| IV                                   | 0.17 (-3.05, 2.83)  |            | 0.62 (-2.02, 3.03)  |            | -1.80 (-2.14, -1.44) |            | 1.12 (-2.99, 5.29)  |            | 0.46 (-2.14, 3.97)   |            |
| Charlson comorbidity index           |                     |            |                     |            |                      |            |                     |            |                      |            |
| 0 (no comorbidity)                   | -0.55 (-3.08, 2.48) | 0.009      | -0.62 (-3.19, 2.19) | <.001      | -1.99 (-2.35, -1.60) | <.001      | -0.97 (-4.81, 2.69) | <.001      | -1.37 (-4.06, 2.22)  | <.001      |
| 1 (mild comorbidity)                 | 0.07 (-3.17, 2.98)  |            | 0.06 (-2.50, 2.95)  |            | -1.79 (-2.16, -1.44) |            | 0.51 (-3.15, 4.34)  |            | 0.11 (-2.53, 3.57)   |            |
| 2 (moderate comorbidity)             | 0.20 (-2.87, 2.93)  |            | 0.47 (-2.40, 3.77)  |            | -1.73 (-2.07, -1.39) |            | 0.50 (-3.51, 5.24)  |            | 0.74 (-1.94, 4.18)   |            |
| 3+ (severe comorbidity)              | 0.50 (-1.65, 3.07)  |            | 0.78 (-2.31, 4.29)  |            | -1.66 (-2.03, -1.34) |            | 1.64 (-2.13, 5.87)  |            | 1.39 (-1.56, 4.66)   |            |
| Tumor subsite                        |                     |            |                     |            |                      |            |                     |            |                      |            |
| Proximal colon †                     | -0.45 (-3.05, 2.70) | 0.436      | -0.43 (-3.25, 2.44) | <.001      | -1.91 (-2.30, -1.53) | <.001      | -0.74 (-4.48, 3.45) | <.001      | -1.12 (-3.81, 2.38)  | <.001      |
| Distal colon ‡                       | 0.07 (-2.86, 2.82)  |            | -0.67 (-3.25, 2.07) |            | -1.98 (-2.33, -1.65) |            | -0.95 (-4.67, 3.22) |            | -0.64 (-3.98, 2.54)  |            |
| Rectum                               | -0.31 (-3.04, 2.47) |            | 0.59 (-2.07, 3.24)  |            | -1.71 (-2.11, -1.35) |            | 0.67 (-2.82, 4.46)  |            | 0.38 (-2.46, 4.19)   |            |
| BMI at diagnosis                     |                     |            |                     |            |                      |            |                     |            |                      |            |
| < 25 kg/m <sup>2</sup>               | -0.31 (-3.30, 2.59) | 0.296      | -0.33 (-3.01, 2.72) | 0.418      | -1.85 (-2.23, -1.44) | 0.038      | -0.41 (-4.18, 3.77) | 0.750      | -0.47 (-3.59, 3.64)  | 0.559      |
| 25 ≤ - < 30 kg/m <sup>2</sup>        | -0.31 (-2.73, 2.75) |            | -0.10 (-2.74, 2.81) |            | -1.88 (-2.26, -1.52) |            | -0.09 (-3.89, 3.75) |            | -0.46 (-3.29, 2.89)  |            |
| ≥ 30 kg/m <sup>2</sup>               | -0.01 (-2.82, 2.81) |            | -0.44 (-2.89, 2.41) |            | -1.92 (-2.29, -1.56) |            | -0.09 (-3.93, 3.51) |            | -0.51 (-3.57, 2.45)  |            |
| Alcohol consumption                  |                     |            |                     |            |                      |            |                     |            |                      |            |
| Abstainer                            | -0.62 (-3.44, 2.22) | 0.012      | -0.94 (-3.32, 1.59) | <.001      | -1.97 (-2.34, -1.58) | <.001      | -0.69 (-4.61, 2.72) | <.001      | -2.53 (-4.92, 0.63)  | <.001      |
| Female: < 20 g/day; Male: < 40 g/day | -0.23 (-2.90, 2.72) |            | -0.26 (-2.96, 2.70) |            | -1.89 (-2.26, -1.52) |            | -0.34 (-4.13, 3.57) |            | -0.42 (-3.28, 3.00)  |            |
| Female: ≥ 20 g/day; Male: ≥ 40 g/day | 0.47 (-2.52, 3.56)  |            | 1.22 (-1.81, 3.72)  |            | -1.72 (-2.09, -1.39) |            | 1.68 (-2.52, 5.94)  |            | 2.17 (-1.27, 5.92)   |            |
| Smoking status                       |                     |            |                     |            |                      |            |                     |            |                      |            |
| Never                                | -0.63 (-3.15, 2.31) | 0.006      | -0.92 (-3.30, 2.11) | <.001      | -2.03 (-2.35, -1.65) | <.001      | -0.83 (-4.43, 2.75) | <.001      | -2.69 (-4.87, -0.18) | <.001      |
| Former                               | -0.09 (-2.83, 2.99) |            | 0.14 (-2.61, 2.86)  |            | -1.84 (-2.22, -1.49) |            | -0.20 (-3.90, 3.71) |            | 0.58 (-2.32, 3.35)   |            |
| Current                              | 0.25 (-2.85, 2.96)  |            | 0.01 (-2.43, 3.01)  |            | -1.59 (-1.98, -1.21) |            | 1.22 (-2.60, 5.77)  |            | 5.25 (1.22, 7.91)    |            |

Abbreviation: AgeAccel, age acceleration; BMI, body mass index; DNAm, DNA methylation; TNM, tumor-node-metastasis; IQR, interquartile range; MET, metabolic equivalent of task; MRscore, mortality risk score.

\**P* values are given by Kruskal-Wallis test to compare the levels of DNA methylation scores across the categorical baseline characteristics.

† The proximal colon includes the cecum, the ascending colon, and the transverse colon.

‡ The distal colon includes the descending colon (the left side of the colon) and the sigmoid colon

Supplementary Table 2. Associations between DNA methylation aging markers and all-cause mortality with comprehensive model

| Markers         | Categories      | Overall                  | Stage I & II             | Stage III                | Stage IV                 |
|-----------------|-----------------|--------------------------|--------------------------|--------------------------|--------------------------|
|                 |                 | HR (95%CI)*              | HR (95%CI)*              | HR (95%CI)*              | HR (95%CI)*              |
| AgeAccelHorvath | Tertile 1       | 1.00 (Ref.)              | 1.00 (Ref.)              | 1.00 (Ref.)              | 1.00 (Ref.)              |
|                 | Tertile 2       | 0.99 (0.85, 1.15)        | 0.93 (0.73, 1.19)        | 0.94 (0.72, 1.23)        | 1.16 (0.83, 1.63)        |
|                 | Tertile 3       | 1.13 (0.97, 1.32)        | 1.24 (0.97, 1.58)        | 1.13 (0.86, 1.49)        | 1.03 (0.75, 1.43)        |
|                 | Per SD increase | 1.05 (0.99, 1.12)        | 1.08 (0.98, 1.19)        | 1.10 (0.99, 1.23)        | 0.99 (0.86, 1.13)        |
| AgeAccelHannum  | Tertile 1       | 1.00 (Ref.)              | 1.00 (Ref.)              | 1.00 (Ref.)              | 1.00 (Ref.)              |
|                 | Tertile 2       | 0.90 (0.76, 1.06)        | 0.90 (0.69, 1.17)        | 0.89 (0.67, 1.19)        | 0.79 (0.53, 1.17)        |
|                 | Tertile 3       | 1.09 (0.92, 1.30)        | 1.21 (0.93, 1.56)        | 1.13 (0.84, 1.53)        | 0.93 (0.61, 1.40)        |
|                 | Per SD increase | 1.06 (0.98, 1.13)        | 1.06 (0.95, 1.19)        | 1.09 (0.96, 1.23)        | 1.03 (0.88, 1.21)        |
| DNAmMRscore     | Tertile 1       | 1.00 (Ref.)              | 1.00 (Ref.)              | 1.00 (Ref.)              | 1.00 (Ref.)              |
|                 | Tertile 2       | 1.07 (0.88, 1.29)        | 1.18 (0.86, 1.61)        | 0.90 (0.64, 1.26)        | 1.11 (0.73, 1.69)        |
|                 | Tertile 3       | <b>1.61 (1.28, 2.02)</b> | <b>1.68 (1.14, 2.46)</b> | <b>1.48 (1.00, 2.18)</b> | <b>1.89 (1.16, 3.09)</b> |
|                 | Per SD increase | <b>1.36 (1.22, 1.52)</b> | <b>1.46 (1.21, 1.76)</b> | <b>1.37 (1.15, 1.65)</b> | <b>1.29 (1.02, 1.63)</b> |
| AgeAccelPheno   | Tertile 1       | 1.00 (Ref.)              | 1.00 (Ref.)              | 1.00 (Ref.)              | 1.00 (Ref.)              |
|                 | Tertile 2       | 0.98 (0.83, 1.15)        | 0.83 (0.64, 1.08)        | 0.94 (0.71, 1.25)        | 1.39 (0.97, 1.98)        |
|                 | Tertile 3       | <b>1.25 (1.07, 1.47)</b> | <b>1.32 (1.03, 1.70)</b> | 1.17 (0.89, 1.55)        | 1.33 (0.92, 1.93)        |
|                 | Per SD increase | <b>1.15 (1.08, 1.23)</b> | <b>1.19 (1.07, 1.31)</b> | <b>1.15 (1.02, 1.29)</b> | 1.14 (0.97, 1.33)        |
| AgeAccelGrim    | Tertile 1       | 1.00 (Ref.)              | 1.00 (Ref.)              | 1.00 (Ref.)              | 1.00 (Ref.)              |
|                 | Tertile 2       | 1.03 (0.92, 1.32)        | 1.26 (0.94, 1.70)        | 0.94 (0.70, 1.27)        | 1.03 (0.70, 1.52)        |
|                 | Tertile 3       | <b>1.69 (1.38, 2.08)</b> | <b>2.28 (1.62, 3.21)</b> | <b>1.56 (1.10, 2.22)</b> | 1.20 (0.79, 1.81)        |
|                 | Per SD increase | <b>1.43 (1.30, 1.56)</b> | <b>1.55 (1.35, 1.78)</b> | <b>1.19 (1.01, 1.40)</b> | <b>1.53 (1.24, 1.90)</b> |

Abbreviation: AgeAccel, age acceleration; CI, confidence interval; DNAm, DNA methylation; HR, hazard ratio; MRscore, mortality risk score.

Numbers printed in bold: statistically significantly different from 1 ( $P < 0.05$ ).

\* Comprehensive model adjusted for age, sex, tumor stages, batch, leukocyte composition, BMI, smoking status, alcohol consumption, tumor sub-sites, and comorbidity index. Tumor stage was not included in the stage-specific analyses.

Supplementary Table 3. Associations between DNA methylation aging markers and CRC-specific mortality with comprehensive model

| Markers        | Categories      | Overall                  | Stage I & II      | Stage III                | Stage IV                 |
|----------------|-----------------|--------------------------|-------------------|--------------------------|--------------------------|
|                |                 | HR (95%CI)*              | HR (95%CI)*       | HR (95%CI)*              | HR (95%CI)*              |
|                | Tertile 1       | 1.00 (Ref.)              | 1.00 (Ref.)       | 1.00 (Ref.)              | 1.00 (ref.)              |
|                | Tertile 2       | 1.02 (0.83, 1.26)        | 0.84 (0.51, 1.39) | 1.02 (0.73, 1.43)        | 1.15 (0.81, 1.64)        |
|                | Tertile 3       | 1.13 (0.92, 1.39)        | 1.57 (0.99, 2.51) | 1.16 (0.82, 1.66)        | 1.01 (0.72, 1.42)        |
|                | Per SD increase | 1.03 (0.95, 1.12)        | 1.17 (0.97, 1.41) | 1.08 (0.93, 1.24)        | 0.96 (0.83, 1.12)        |
| AgeAccelHannum | Tertile 1       | 1.00 (Ref.)              | 1.00 (Ref.)       | 1.00 (Ref.)              | 1.00 (ref.)              |
|                | Tertile 2       | 0.93 (0.74, 1.17)        | 1.48 (0.90, 2.45) | 0.79 (0.54, 1.15)        | 0.82 (0.54, 1.23)        |
|                | Tertile 3       | 1.04 (0.82, 1.33)        | 1.25 (0.72, 2.16) | 1.13 (0.77, 1.65)        | 0.92 (0.60, 1.42)        |
|                | Per SD increase | 1.06 (0.96, 1.17)        | 1.06 (0.84, 1.32) | 1.09 (0.93, 1.28)        | 1.05 (0.88, 1.24)        |
| DNAmMRscore    | Tertile 1       | 1.00 (Ref.)              | 1.00 (Ref.)       | 1.00 (Ref.)              | 1.00 (ref.)              |
|                | Tertile 2       | 0.91 (0.70, 1.19)        | 1.09 (0.61, 1.94) | 0.85 (0.55, 1.32)        | 1.05 (0.68, 1.62)        |
|                | Tertile 3       | <b>1.52 (1.12, 2.06)</b> | 1.30 (0.64, 2.68) | <b>1.69 (1.02, 2.79)</b> | <b>1.73 (1.03, 2.88)</b> |
|                | Per SD increase | <b>1.31 (1.13, 1.52)</b> | 1.40 (0.99, 2.00) | <b>1.43 (1.13, 1.81)</b> | 1.24 (0.97, 1.59)        |
| AgeAccelPheno  | Tertile 1       | 1.00 (Ref.)              | 1.00 (Ref.)       | 1.00 (Ref.)              | 1.00 (ref.)              |
|                | Tertile 2       | 1.22 (0.98, 1.52)        | 1.01 (0.62, 1.67) | 1.07 (0.74, 1.54)        | <b>1.48 (1.02, 2.13)</b> |
|                | Tertile 3       | <b>1.28 (1.02, 1.60)</b> | 1.27 (0.76, 2.13) | 1.23 (0.86, 1.77)        | 1.28 (0.88, 1.88)        |
|                | Per SD increase | <b>1.15 (1.05, 1.26)</b> | 1.17 (0.96, 1.43) | <b>1.19 (1.03, 1.39)</b> | 1.10 (0.94, 1.30)        |
| AgeAccelGrim   | Tertile 1       | 1.00 (Ref.)              | 1.00 (Ref.)       | 1.00 (Ref.)              | 1.00 (ref.)              |
|                | Tertile 2       | 0.95 (0.76, 1.20)        | 1.15 (0.67, 1.96) | 0.77 (0.53, 1.13)        | 1.01 (0.68, 1.49)        |
|                | Tertile 3       | 1.25 (0.95, 1.65)        | 1.62 (0.83, 3.16) | 1.25 (0.79, 1.97)        | 1.13 (0.74, 1.75)        |
|                | Per SD increase | <b>1.27 (1.12, 1.45)</b> | 1.28 (0.99, 1.68) | 1.10 (0.89, 1.36)        | <b>1.48 (1.19, 1.85)</b> |

Abbreviation: AgeAccel, age acceleration; CI, confidence interval; DNAm, DNA methylation; HR, hazard ratio; MRscore, mortality risk score.

Numbers printed in bold: statistically significantly different from 1 ( $P < 0.05$ ).

\* Comprehensive model adjusted for age, sex, tumor stages, batch, leukocyte composition, BMI, smoking status, alcohol consumption, tumor sub-sites, and comorbidity index. Tumor stage was not included in the stage-specific analyses.

Supplementary Table 4. Associations of DNA methylation aging markers with all-cause and CRC-specific mortality only among patients who did not received any chemotherapy or radiotherapy during the follow-up

| Markers         | Categories        | Overall survival                    |                               |                                    | CRC-specific survival               |                               |                                    |
|-----------------|-------------------|-------------------------------------|-------------------------------|------------------------------------|-------------------------------------|-------------------------------|------------------------------------|
|                 |                   | $n_{\text{death}}/n_{\text{cases}}$ | Clinical model*<br>HR (95%CI) | Comprehensive model#<br>HR (95%CI) | $n_{\text{death}}/n_{\text{cases}}$ | Clinical model*<br>HR (95%CI) | Comprehensive model#<br>HR (95%CI) |
| AgeAccelHorvath | Tertile 1         | 159/363                             | Ref.                          | Ref.                               | 56/362                              | Ref.                          | Ref.                               |
|                 | Tertile 2         | 160/395                             | 1.08 (0.85, 1.35)             | 1.05 (0.83, 1.34)                  | 53/393                              | 1.15 (0.77, 1.74)             | 1.16 (0.77, 1.75)                  |
|                 | Tertile 3         | 189/384                             | <b>1.30 (1.04, 1.63)</b>      | <b>1.26 (1.00, 1.58)</b>           | 65/381                              | 1.33 (0.90, 1.98)             | 1.37 (0.92, 2.05)                  |
|                 | Per 1 SD increase | 508/1142                            | <b>1.11 (1.01, 1.22)</b>      | <b>1.11 (1.01, 1.22)</b>           | 174/1136                            | 1.08 (0.92, 1.26)             | 1.09 (0.93, 1.28)                  |
| AgeAccelHannum  | Tertile 1         | 152/386                             | Ref.                          | Ref.                               | 47/385                              | Ref.                          | Ref.                               |
|                 | Tertile 2         | 151/384                             | 0.85 (0.67, 1.09)             | 0.84 (0.66, 1.08)                  | 62/383                              | 1.03 (0.68, 1.56)             | 0.95 (0.61, 1.45)                  |
|                 | Tertile 3         | 205/372                             | 1.11 (0.86, 1.42)             | 1.16 (0.91, 1.50)                  | 65/368                              | 1.02 (0.65, 1.60)             | 1.06 (0.67, 1.69)                  |
|                 | Per 1 SD increase | 508/1142                            | 1.04 (0.94, 1.17)             | 1.07 (0.96, 1.19)                  | 174/1136                            | 1.05 (0.88, 1.27)             | 1.08 (0.89, 1.31)                  |
| DNAmMRscore     | Tertile 1         | 110/396                             | Ref.                          | Ref.                               | 41/395                              | Ref.                          | Ref.                               |
|                 | Tertile 2         | 176/400                             | <b>1.40 (1.06, 1.85)</b>      | 1.26 (0.94, 1.68)                  | 57/397                              | 1.22 (0.76, 1.97)             | 1.09 (0.66, 1.81)                  |
|                 | Tertile 3         | 222/346                             | <b>2.30 (1.66, 3.20)</b>      | <b>1.89 (1.32, 2.69)</b>           | 76/344                              | <b>1.99 (1.14, 3.49)</b>      | 1.80 (0.98, 3.33)                  |
|                 | Per 1 SD increase | 508/1142                            | <b>1.62 (1.40, 1.89)</b>      | <b>1.50 (1.26, 1.77)</b>           | 174/1136                            | <b>1.52 (1.17, 1.97)</b>      | <b>1.47 (1.10, 1.98)</b>           |
| AgeAccelPheno   | Tertile 1         | 146/402                             | Ref.                          | Ref.                               | 46/402                              | Ref.                          | Ref.                               |
|                 | Tertile 2         | 155/386                             | 1.02 (0.80, 1.30)             | 0.95 (0.74, 1.20)                  | 68/384                              | 1.41 (0.94, 2.12)             | 1.46 (0.97, 2.21)                  |
|                 | Tertile 3         | 207/354                             | <b>1.39 (1.10, 1.76)</b>      | 1.26 (0.99, 1.59)                  | 60/350                              | 1.17 (0.76, 1.81)             | 1.19 (0.77, 1.84)                  |
|                 | Per 1 SD increase | 508/1142                            | <b>1.27 (1.16, 1.40)</b>      | <b>1.24 (1.12, 1.36)</b>           | 174/1136                            | <b>1.20 (1.01, 1.43)</b>      | <b>1.20 (1.00, 1.43)</b>           |
| AgeAccelGrim    | Tertile 1         | 124/414                             | Ref.                          | Ref.                               | 52/414                              | Ref.                          | Ref.                               |
|                 | Tertile 2         | 174/386                             | 1.28 (0.99, 1.66)             | 1.28 (0.97, 1.67)                  | 56/384                              | 1.10 (0.72, 1.69)             | 1.24 (0.79, 1.95)                  |
|                 | Tertile 3         | 210/342                             | <b>2.49 (1.88, 3.31)</b>      | <b>2.46 (1.81, 3.36)</b>           | 66/338                              | <b>1.72 (1.07, 2.76)</b>      | <b>1.99 (1.17, 3.38)</b>           |
|                 | Per 1 SD increase | 508/1142                            | <b>1.66 (1.47, 1.87)</b>      | <b>1.76 (1.52, 2.03)</b>           | 174/1136                            | <b>1.43 (1.16, 1.76)</b>      | <b>1.53 (1.19, 1.96)</b>           |

Abbreviation: AgeAccel, age acceleration; CI, confidence interval; HR, hazard ratio; MRscore, mortality risk score.

Numbers printed in bold: statistically significantly different from 1 ( $P < 0.05$ ).

\* Clinical model adjusted for age, sex, tumor stage, batch, and leukocyte composition.

# Comprehensive model adjusted for age, sex, tumor stage, batch, and leukocyte composition, and additionally for BMI, smoking status, alcohol consumption, tumor sub-sites, and comorbidity index.

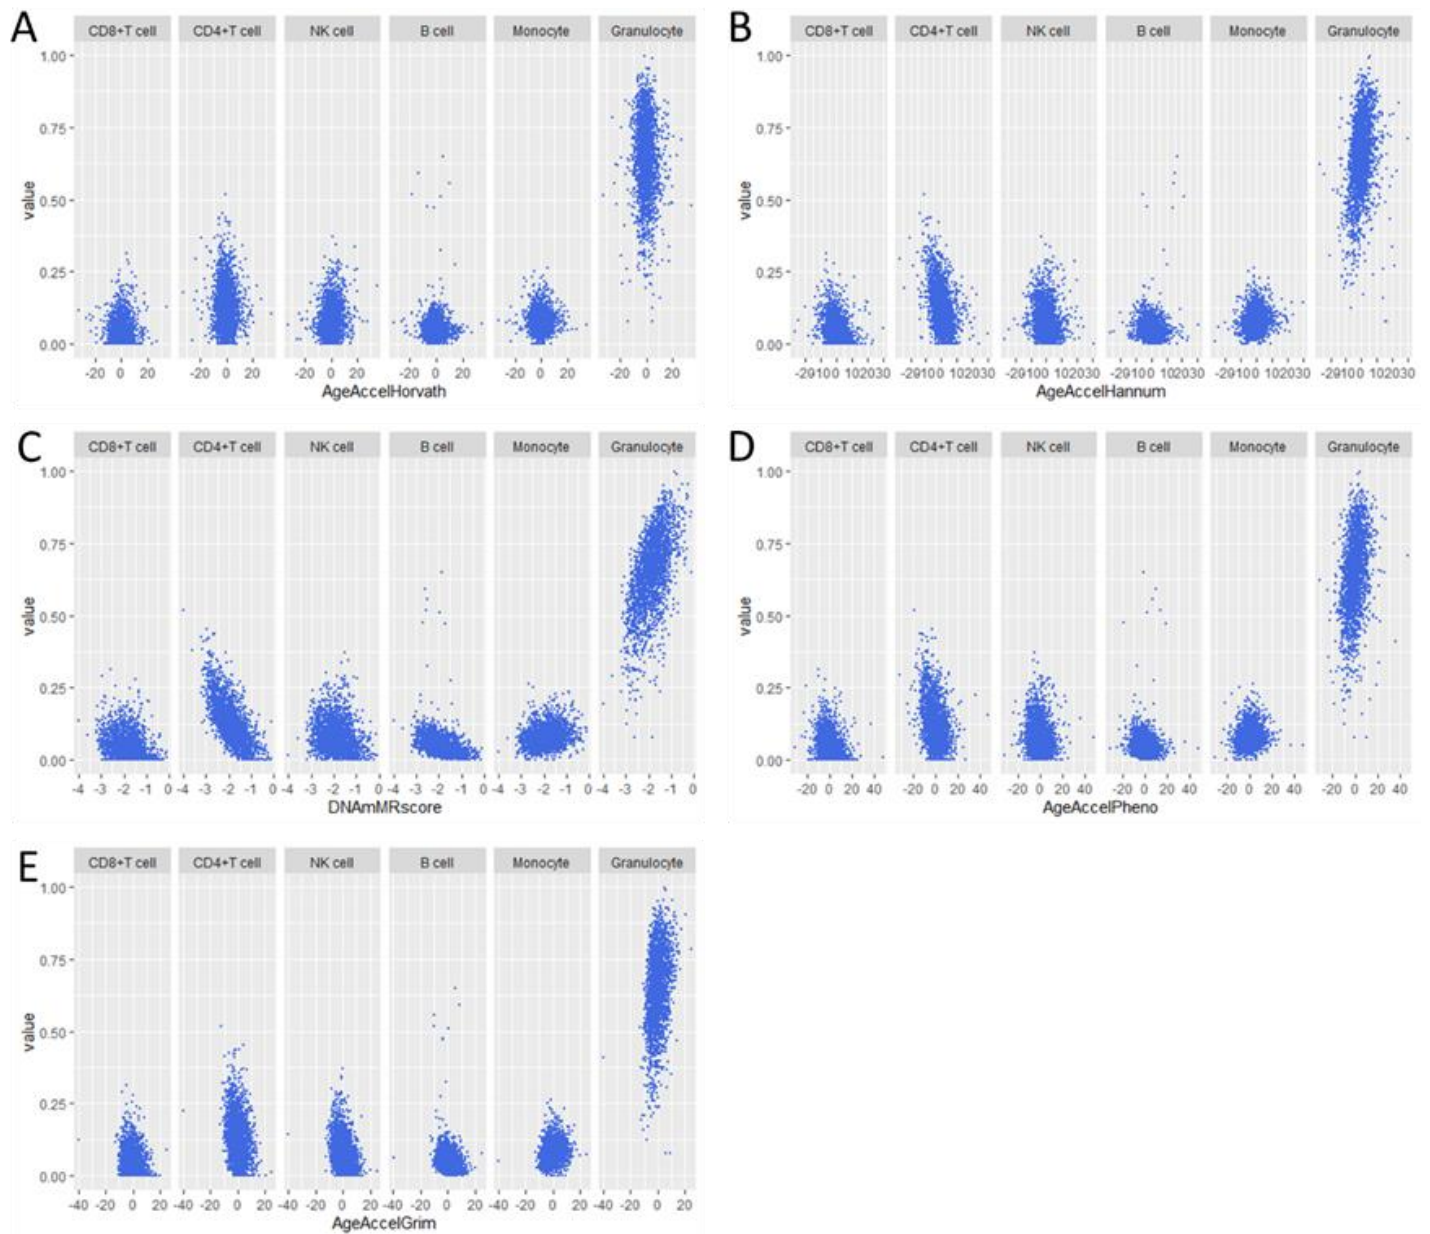

Supplementary Figure 1. Correlation of leukocyte composition with (A) AgeAccelHorvath; (B) AgeAccelHannum; (C) DNAmMRscore; (D) AgeAccelPheno; (E) AgeAccelGrim.

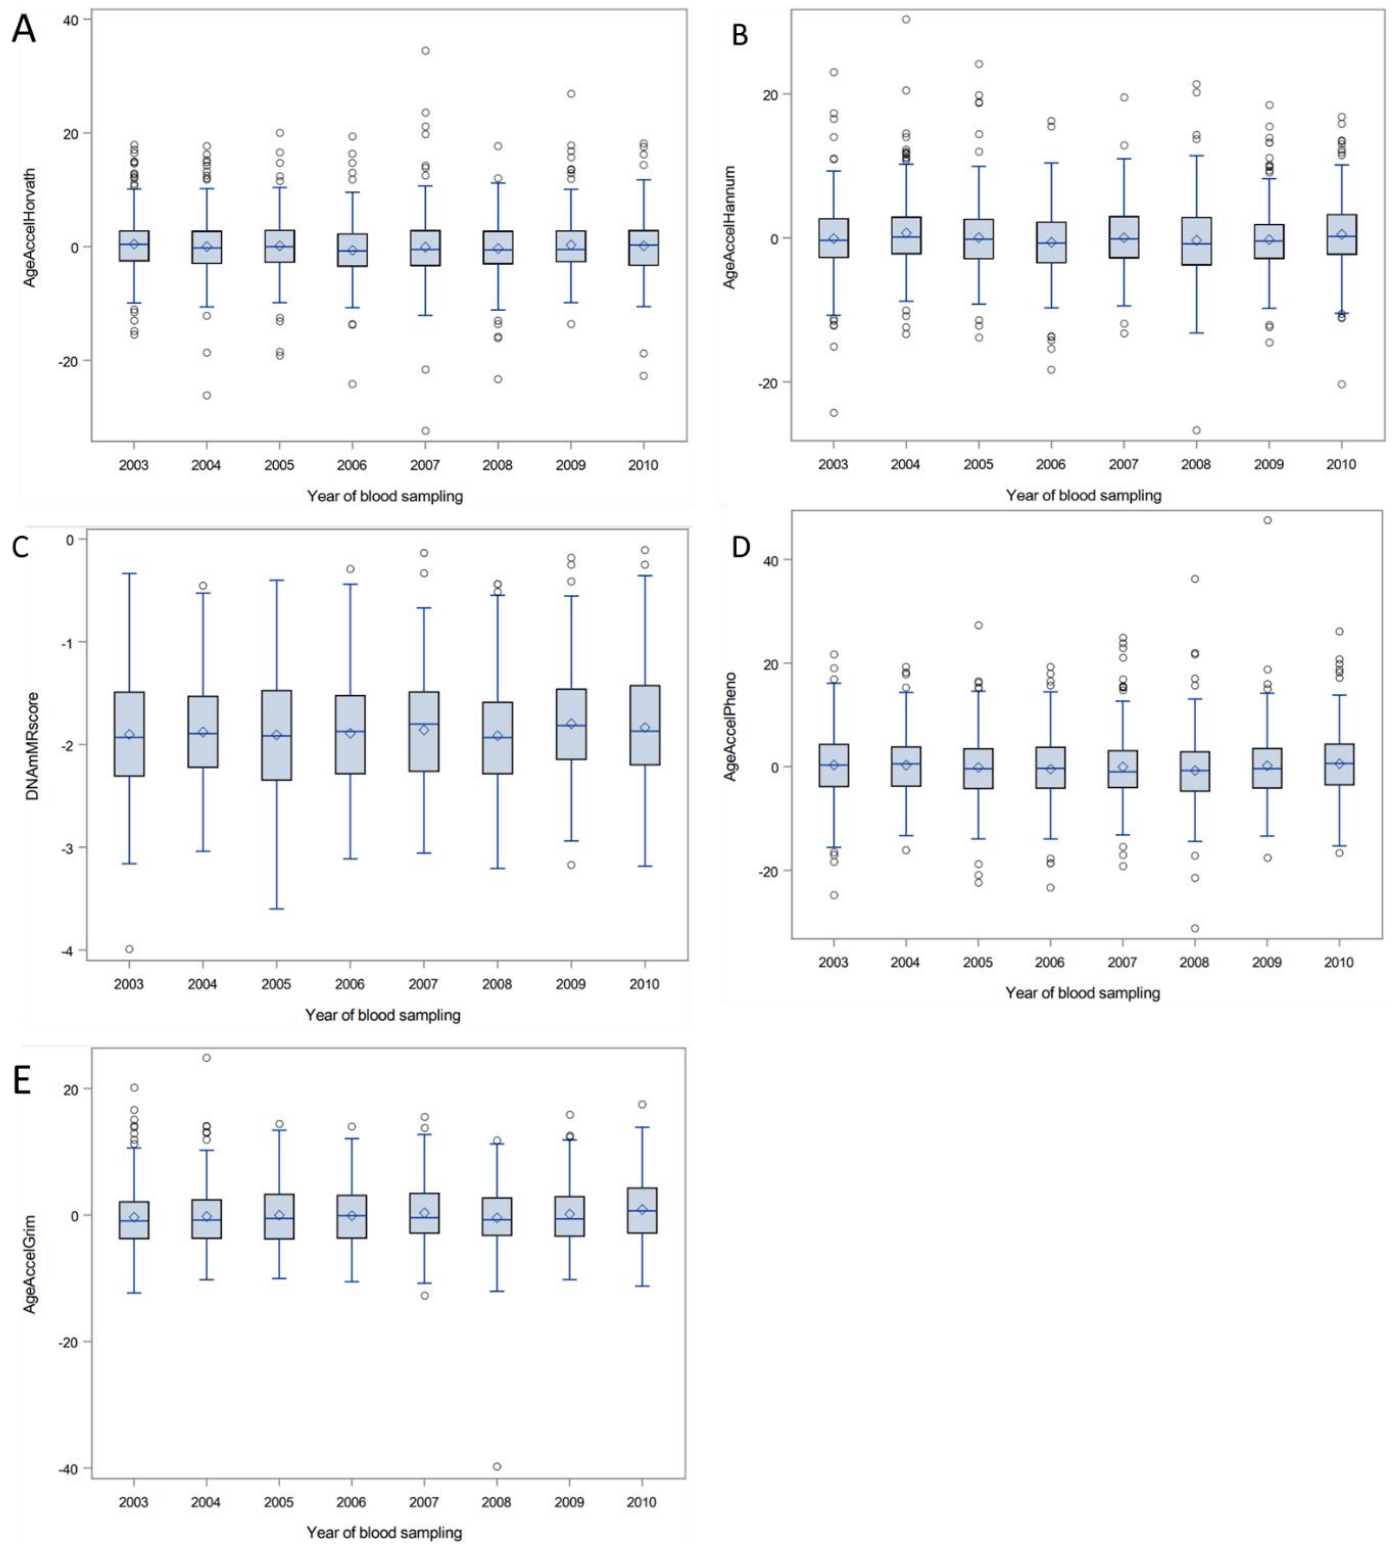

Supplementary Figure 2. Distribution of (A) AgeAccelHorvath, (B) AgeAccelHannum, (C) DNAmMRscore, (D) AgeAccelPheno and (E) AgeAccelGrim according to the year of blood sampling.

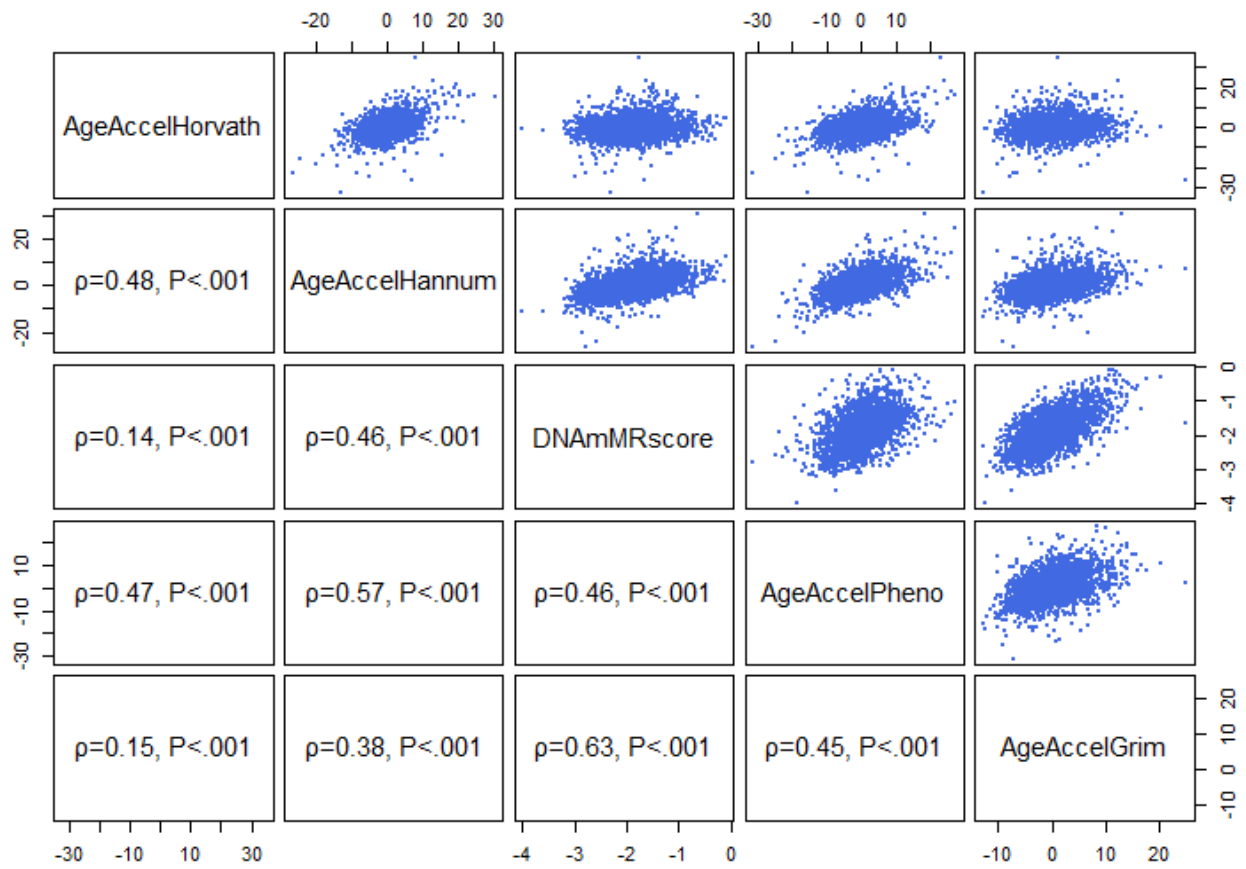

Supplementary Figure 3. Correlation matrix among the five DNA methylation aging algorithms. Numbers in the figure are Pearson correlation coefficients and  $P$  values. All correlation coefficients are significantly different from zero ( $P < 0.001$ ).
